# Supplementary material
Source: publisher site journal article supplement (https://www.dovepress.com/get_supplementary_file.php?f=223002.docx)
Supplement: Supplementary file 1 [file get_supplementary_file.php]

**Supplementary Appendix**

**Imidafenacin, an orally active muscarinic receptor antagonist, improves pulmonary function in patients with chronic obstructive pulmonary disease: a multicenter, randomized, double-blind, placebo-controlled 3×3 crossover phase II trial**

Kentaro Machida, Tomotaka Kawayama, Masaharu Kinoshita, Masakazu Ichinose, Tohru Tsuda, Shohei Takata, Hiroshi Koto, Makoto Yoshida, Yoshinori Ashihara, Masaru Kawashima, Hideaki Suna, Hiromasa Inoue

**Abbreviation:** ANCOVA, Analysis of covariance; CI, confidence interval; FEV1, forced expiratory volume in 1s; IM, imidafenacin; MMF, Maximal Midexpiratory Flow; PEF, Peak Expiratory Flow; SEM, standard error of the mean

**Supplementary Figure 1. Changes in ventilating airway pressure from baseline (%) on methacholine-induced bronchial constriction in guinea pigs**


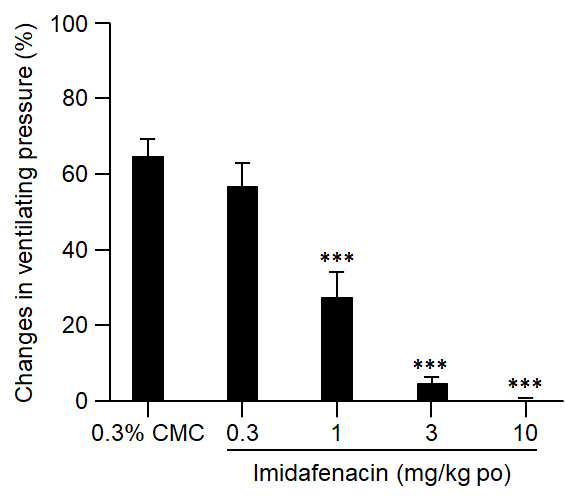


The effect of oral imidafenacin on methacholine induced bronchial contraction was evaluated using anesthetized tracheostomized guinea pigs underwent mechanical ventilation by Konzett & Rössler method.

The animal experiments were reviewed by the Institutional Animal Care and Use Committee, authorized by the director of Research Headquarters of Ono Pharmaceutical Co., Ltd., and performed in accordance with Regulations for Animal Experiments of Ono Pharmaceutical Co., Ltd (Osaka, Japan).

Briefly, 0.3% carboxymethylcellulose (CMC) or imidafenacin (0.3 to 10 mg/10mL/kg) was orally administered at 1 hour before the methacholine dose (12.5 μg/kg, i.v.). Tracheostomy was performed on the animals under a pentobarbital sodium anesthesia. After surgery, pentobarbital sodium was intravenously adiministered until the animals stop spontaneous breathing. Then, the animals were mechanically ventilated using a volume controlled respirator (Model SN-480-7, Shinano Seisakusho, Tokyo, Japan) at a tidal volume of 4 mL and respiratory rate of 70 strokes/min. Ventilating pressure was measured using a differential pressure transducer connected to the side arm of the breathing circuit. The maximum ventilating pressure was measured by clamping the cannulation tube from the outlet port of the respirator. Change in ventilating pressure was determined as the difference between the baseline value before the methacholine dose and the peak value after the methacholine dose, which is indicated by its percentage (%) versus the maximum ventilating pressure. Data are shown with the mean + standard deviation. The sample size is 12 per group. *** p<0.001, Dunnett’s test versus the control group (0.3% CMC). p<0.0001: linear regression analysis.

**Supplementary Table 1. FEV1 (L) values at each time point**

| Time points | Treatment | Mean (SEM) | Point estimation [95% CI] | p value |
| --- | --- | --- | --- | --- |
| 0 h (Baseline) | Placebo | 1.345 (0.077) | – | – |
|  | IM 0.1 mg | 1.342 (0.080) | - | - |
|  | IM 0.2 mg | 1.373 (0.078) | - | - |
| 1 h | Placebo | 1.357 (0.077) | - | - |
|  | IM 0.1 mg | 1.421 (0.077) | 0.069 [0.010, 0.129] | 0.0233* |
|  | IM 0.2 mg | 1.448 (0.074) | 0.069 [0009, 0.130] | 0.0246* |
| 2 h | Placebo | 1.355 (0.078) | - | - |
|  | IM 0.1 mg | 1.443 (0.076) | 0.091 [0.037, 0.144] | 0.0014* |
|  | IM 0.2 mg | 1.510 (0.073) | 0.128 [0.074, 0.182] | <0.0001* |
| 3 h | Placebo | 1.372 (0.077 | - | - |
|  | IM 0.1 mg | 1.453 (0.076) | 0.084 [0.030, 0.138] | 0.0033* |
|  | IM 0.2 mg | 1.513 (0.075) | 0.115 [0.060, 0.169] | 0.0001* |
| 4 h | Placebo | 1.344 (0.074) | - | - |
|  | IM 0.1 mg | 1.413 (0.078) | 0.074 [0.016, 0.133] | 0.0143* |
|  | IM 0.2 mg | 1.450 (0.075) | 0.086 [0.027, 0.145] | 0.0055* |
| 8 h | Placebo | 1.308 (0.075) | - | - |
|  | IM 0.1 mg | 1.338 (0.074) | 0.035 [-0.009, 0.079] | 0.1 |
|  | IM 0.2 mg | 1.406 (0.076) | 0.081 [0.036, 0126] | 0.0009* |
| 12 h | Placebo | 1.283 (0.076) | - | - |
|  | IM 0.1 mg | 1.322 (0.075) | 0.044 [-0.006, 0.094] | 0.1 |
|  | IM 0.2 mg | 1.355 (0.074) | 0.054 [0.004, 0.105] | 0.0366* |
| 24 h | Placebo | 1.358 (0.082) | - | - |
|  | IM 0.1 mg | 1.352 (0.076) | -0.002 [-0.057, 0.053] | 0.9 |
|  | IM 0.2 mg | 1.372 (0.079) | -0.010 [-0.065, 0.046] | 0.7 |

**Supplementary Table 2A. Peak Expiratory Flow (PEF, L/s) values at each time point**

| Time points | Treatment | Mean (SEM) | Point estimation [95% CI] | p value |
| --- | --- | --- | --- | --- |
| 0 h (Baseline) | Placebo | 4.212 (0.349) | – | – |
|  | IM 0.1 mg | 4.343 (0.315) | - | - |
|  | IM 0.2 mg | 4.510 (0.361) | - | - |
| 1 h | Placebo | 4.133 (0.377) | - | - |
|  | IM 0.1 mg | 4.359 (0.332) | 0.110 [-0.249, 0.468] | 0.5 |
|  | IM 0.2 mg | 4.650 (0.320) | 0.250 [-0.113, 0.614] | 0.1 |
| 2 h | Placebo | 4.297 (0.347) | - | - |
|  | IM 0.1 mg | 4.573 (0.350) | 0.148 [-0.215, 0.511] | 0.4 |
|  | IM 0.2 mg | 4.788 (0.364) | 0.199 [-0.169, 0.567] | 0.3 |
| 3 h | Placebo | 4.359 (0.353) | - | - |
|  | IM 0.1 mg | 4.572 (0.361) | 0.110 [-0.229, 0.448] | 0.5 |
|  | IM 0.2 mg | 4.755 (0.343) | 0.157 [-0.187, 0.500] | 0.4 |
| 4 h | Placebo | 4.158 (0.310) | - | - |
|  | IM 0.1 mg | 4.380 (0.363) | 0.111 [-0.258, 0.480] | 0.5 |
|  | IM 0.2 mg | 4.614 (0.343) | 0.202 [-0.173, 0.576] | 0.3 |
| 8 h | Placebo | 4.169 (0.338) | - | - |
|  | IM 0.1 mg | 4.323 (0.327) | 0.059 [-0.224, 0.343] | 0.7 |
|  | IM 0.2 mg | 4.466 (0.344) | 0.079 [-0.211, 0.368] | 0.6 |
| 12 h | Placebo | 4.030 (0.323) | - | - |
|  | IM 0.1 mg | 4.229 (0.298) | 0.123 [-0.169, 0.415] | 0.4 |
|  | IM 0.2 mg | 4.101 (0.309) | -0.105 [-0.403, 0.193] | 0.5 |
| 24 h | Placebo | 4.437 (0.340) | - | - |
|  | IM 0.1 mg | 4.465 (0.342) | -0.085 [-0.404, 0.234] | 0.6 |
|  | IM 0.2 mg | 4.511 (0.349) | -0.187 [-0.510, 0.137] | 0.2 |

**Supplementary Table 2B. Maximal Midexpiratory Flow (MMF, L/s) values at each time point**

| Time points | Treatment | Mean (SEM) | Point estimation [95% CI] | p value |
| --- | --- | --- | --- | --- |
| 0 h (Baseline) | Placebo | 0.439 (0.031) | – | – |
|  | IM 0.1 mg | 0.461 (0.038) | - | - |
|  | IM 0.2 mg | 0.453 (0.033) | - | - |
| 1 h | Placebo | 0.447 (0.033) | - | - |
|  | IM 0.1 mg | 0.486 (0.038) | 0.020 [-0.013, 0.052] | 0.2 |
|  | IM 0.2 mg | 0.488 (0.034) | 0.031 [-0.001, 0.064] | 0.1 |
| 2 h | Placebo | 0.457 (0.035) | - | - |
|  | IM 0.1 mg | 0.487 (0.038) | 0.012 [-0.025, 0.049] | 0.5 |
|  | IM 0.2 mg | 0.505 (0.036) | 0.040 [0.002, 0.078] | 0.0381* |
| 3 h | Placebo | 0.472 (0.037) | - | - |
|  | IM 0.1 mg | 0.490 (0.037) | -0.002 [-0.046, 0.042] | 0.9 |
|  | IM 0.2 mg | 0.503 (0.038) | 0.019 [-0.026, 0.064] | 0.4 |
| 4 h | Placebo | 0.447 (0.036) | - | - |
|  | IM 0.1 mg | 0.460 (0.034) | -0.004 [-0.045, 0.037] | 0.8 |
|  | IM 0.2 mg | 0.479 (0.036) | 0.025 [-0.016, 0.067] | 0.2. |
| 8 h | Placebo | 0.440 (0.033) | - | - |
|  | IM 0.1 mg | 0.434 (0.030) | -0.025 [-0.059, 0.009] | 0.1. |
|  | IM 0.2 mg | 0.482 (0.038) | 0.032 [-0.002, 0.066] | 0.1 |
| 12 h | Placebo | 0.410 (0.028) | - | - |
|  | IM 0.1 mg | 0.428 (0.033) | -0.001 [-0.030, 0.028] | 0.9 |
|  | IM 0.2 mg | 0.449 (0.034) | 0.027 [-0.002, 0.056] | 0.1 |
| 24 h | Placebo | 0.458 (0.034) | - | - |
|  | IM 0.1 mg | 0.441 (0.033) | -0.038 [-0.078, 0.003] | 0.1 |
|  | IM 0.2 mg | 0.486 (0.041) | 0.016 [-0.025, 0.057] | 0.4 |

**Supplementary Table 2C. Maximum expiratory flow rate at 50% (L/s) values at each time point**

| Time points | Treatment | Mean (SEM) | Point estimation [95% CI] | p value |
| --- | --- | --- | --- | --- |
| 0 h (Baseline) | Placebo | 0.555 (0.051) | – | – |
|  | IM 0.1 mg | 0.607 (0.062) | - | - |
|  | IM 0.2 mg | 0.588 (0.058) | - | - |
| 1 h | Placebo | 0.583 (0.059) | - | - |
|  | IM 0.1 mg | 0.613 (0.059) | -0.017 [-0.078, 0.045] | 0.6 |
|  | IM 0.2 mg | 0.623 (0.055) | 0.012 [-0.050, 0.074] | 0.7 |
| 2 h | Placebo | 0.583 (0.055) | - | - |
|  | IM 0.1 mg | 0.618 (0.055) | -0.011 [-0.072, 0.049] | 0.7 |
|  | IM 0.2 mg | 0.663 (0.069) | 0.055 [-0.006, 0.116] | 0.1 |
| 3 h | Placebo | 0.612 (0.064) | - | - |
|  | IM 0.1 mg | 0.652 (0.065) | -0.013 [-0.097, 0.071] | 0.8 |
|  | IM 0.2 mg | 0.662 (0.063) | 0.014 [-0.071, 0.098] | 0.7 |
| 4 h | Placebo | 0.570 (0.057) | - | - |
|  | IM 0.1 mg | 0.605 (0.058) | -0.009 [-0.081, 0.063] | 0.8 |
|  | IM 0.2 mg | 0.605 (0.056) | 0.010 [-0.063, 0.082] | 0.8 |
| 8 h | Placebo | 0.557 (0.053) | - | - |
|  | IM 0.1 mg | 0.554 (0.050) | -0.048 [-0.096, 0.001] | 0.1 |
|  | IM 0.2 mg | 0.608 (0.060) | 0.024 [-0.025, 0.073] | 0.3 |
| 12 h | Placebo | 0.514 (0.049) | - | - |
|  | IM 0.1 mg | 0.560 (0.062) | 0.003 [-0.049, 0.054] | 0.9 |
|  | IM 0.2 mg | 0.558 (0.053) | 0.015 [-0.037, 0.066] | 0.6 |
| 24 h | Placebo | 0.596 (0.066) | - | - |
|  | IM 0.1 mg | 0.565 (0.052) | -0.075 [-0.146, -0.005] | 0.0357* |
|  | IM 0.2 mg | 0.600 (0.062) | -0.023 [-0.094, 0.047] | 0.5 |

**Supplementary Table 2D. Maximum expiratory flow rate at 25% (L/s) values at each time point**

| Time points | Treatment | Mean (SEM) | Point estimation [95% CI] | p value |
| --- | --- | --- | --- | --- |
| 0 h (Baseline) | Placebo | 0.194 (0.010) | – | – |
|  | IM 0.1 mg | 0.193 (0.008) | - | - |
|  | IM 0.2 mg | 0.195 (0.007) | - | - |
| 1 h | Placebo | 0.194 (0.009) | - | - |
|  | IM 0.1 mg | 0.215 (0.012) | 0.023 [0.007, 0.040] | 0.0080* |
|  | IM 0.2 mg | 0.207 (0.009) | 0.014 [-0.003, 0.031] | 0.1 |
| 2 h | Placebo | 0.196 (0.007) | - | - |
|  | IM 0.1 mg | 0.220 (0.020) | 0.025 [-0.005, 0.055] | 0.1 |
|  | IM 0.2 mg | 0.217 (0.013) | 0.023 [-0.007, 0.053] | 0.1 |
| 3 h | Placebo | 0.197 (0.012) | - | - |
|  | IM 0.1 mg | 0.201 (0.010) | 0.006 [-0.016, 0.028] | 0.6 |
|  | IM 0.2 mg | 0.208 (0.013) | 0.013 [-0.009, 0.035] | 0.2 |
| 4 h | Placebo | 0.189 (0.010) | - | - |
|  | IM 0.1 mg | 0.203 (0.009) | 0.015 [0.001, 0.030] | 0.0420* |
|  | IM 0.2 mg | 0.198 (0.009) | 0.010 [-0.004, 0.025] | 0.2 |
| 8 h | Placebo | 0.194 (0.011) | - | - |
|  | IM 0.1 mg | 0.187 (0.008) | -0.006 [-0.024, 0.013] | 0.5 |
|  | IM 0.2 mg | 0.197 (0.008) | 0.003 [-0.016, 0.022] | 0.7 |
| 12 h | Placebo | 0.188 (0.009) | - | - |
|  | IM 0.1 mg | 0.188 (0.011) | 0.001 [-0.018, 0.020] | 0.9 |
|  | IM 0.2 mg | 0.193 (0.008) | 0.005 [-0.014, 0.024] | 0.6 |
| 24 h | Placebo | 0.201 (0.011) | - | - |
|  | IM 0.1 mg | 0.192 (0.008) | -0.008 [-0.035, 0.020] | 0.6 |
|  | IM 0.2 mg | 0.210 (0.014) | 0.009 [-0.018, 0.037] | 0.5 |

**Supplementary Table 2E. Ratio of maximum expiratory flow rate at 50%/25% values at each time point**

| Time points | Treatment | Mean (SEM) | Point estimation [95% CI] | p value |
| --- | --- | --- | --- | --- |
| 0 h (Baseline) | Placebo | 2.815 (0.196) | – | – |
|  | IM 0.1 mg | 3.027 (0.219) | - | - |
|  | IM 0.2 mg | 2.942 (0.244) | - | - |
| 1 h | Placebo | 2.975 (0.270) | - | - |
|  | IM 0.1 mg | 2.836 (0.240) | -0.202 [-0.433, 0.028] | 0.1 |
|  | IM 0.2 mg | 2.993 (0.229) | -0.020 [-0.250, 0.211] | 0.9 |
| 2 h | Placebo | 2.914 (0.249) | - | - |
|  | IM 0.1 mg | 2.915 (0.216) | -0.176 [-0.535, 0.183] | 0.3 |
|  | IM 0.2 mg | 3.106 (0.313) | 0.099 [-0.263, 0.460] | 0.6 |
| 3 h | Placebo | 3.062 (0.238) | - | - |
|  | IM 0.1 mg | 3.201 (0.265) | -0.107 [-1.046, 0.831] | 0.8 |
|  | IM 0.2 mg | 3.594 (0.609) | 0.313 [-0.633, 1.259] | 0.5 |
| 4 h | Placebo | 3.001 (0.251) | - | - |
|  | IM 0.1 mg | 2.945 (0.241) | -0.239 [-0.633, 0.156] | 0.2 |
|  | IM 0.2 mg | 2.988 (0.208) | -0.126 [-0.524, 0.271] | 0.5 |
| 8 h | Placebo | 2.898 (0.274) | - | - |
|  | IM 0.1 mg | 2.931 (0.217) | -0.095 [-0.466, 0.275] | 0.6 |
|  | IM 0.2 mg | 3.009 (0.230) | 0.040 [-0.332, 0.413] | 0.8 |
| 12 h | Placebo | 2.745 (0.242) | - | - |
|  | IM 0.1 mg | 2.971 (0.296) | 0.073 [-0.313, 0.459] | 0.7 |
|  | IM 0.2 mg | 2.815 (0.192) | -0.035 [-0.424, 0.353] | 0.9 |
| 24 h | Placebo | 3.080 (0.422) | - | - |
|  | IM 0.1 mg | 2.876 (0.198) | -0.395 [-1.017, 0.229] | 0.2 |
|  | IM 0.2 mg | 2.842 (0.247) | -0.335 [-0.963, 0.293] | 0.3 |

**Note:** Number of subjects were 24 in all analyses. Point estimation [95% CI] of FEV1, PEF, MMF, and maximum expiratory flow rate at 50%, 25% and 50%/25% with imidafenacin 0.1 and 0.2 mg were compared to that with placebo at each time point by ANCOVA tests, which included this endpoint as the response variable, each baseline value at each test period as covariates, test drug effects, group effects, and period effects as factors, and subjects as random effects (Supplementary Table 1 and Table 2). *P <0.05 versus placebo

**Investigator List**

Tohru Tsuda, Takeo Jimi (Kirigaoka Tsuda Hospital), Shohei Takata (National Hospital Organization Fukuoka-Higashi Medical Center), Hiroshi Koto, Nobutaka Nakashima (Kyushu Central Hospital of the Mutual Aid Association of Public School Teachers), Makoto Yoshida, Masashi Komori, Akiko Ishimatsu, Reiko Kishikawa (National Hospital Organization Fukuoka Hospital), Tomotaka Kawayama (Kurume University Hospital), Yoshinori Ashihara (Oita Nakamura Hospital), Masaharu Kinoshita, Eiichi Higuchi (Nagata Hospital), Hiromasa Inoue, and Takuya Samukawa (Kagoshima University Medical and Dental Hospital).
